# Supplementary material for: Insights into elusive and cooperative multi-oxidant mechanisms in enabling catalytic methane-to-methanol conversion over atomically dispersed metals
Source: Royal Society of Chemistry journal article supplement (doi:10.1039/d3qi00079f), 2023-01-01
Supplement: d3qi00079f1.pdf [file d3qi00079f1.pdf]

## Supplementary Information

### **Insights into elusive and cooperative multi-oxidant mechanisms in enabling catalytic methane-to-methanol conversion over atomically dispersed metals**

Li-Long Zhang,<sup>1†</sup> Yaqiong Su,<sup>2,3†</sup> Dandan Chen,<sup>1</sup> Hongguo Wu,<sup>1</sup> Feng Xu,<sup>1</sup> Hu Li,<sup>1,\*</sup>  
Song Yang,<sup>1,\*</sup>

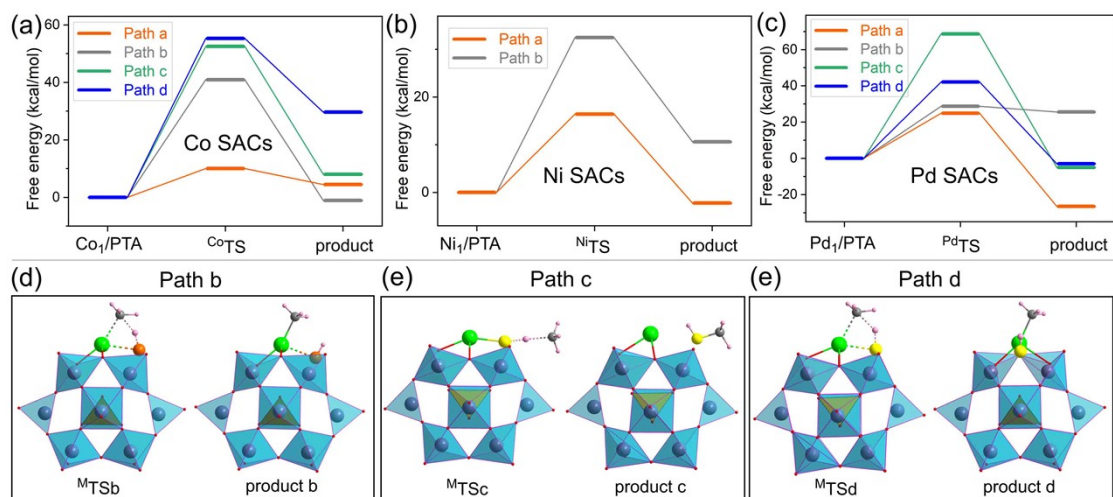

**Fig. S1.** The four possible reaction paths of removing  $O_b$  or  $O_c$  for Ni (only  $O_b$ ), Co and Pd SACs shown in (a), (b) and (c), respectively. The corresponding of geometry structures of path b, c and d were shown in (d), (e) and (f).

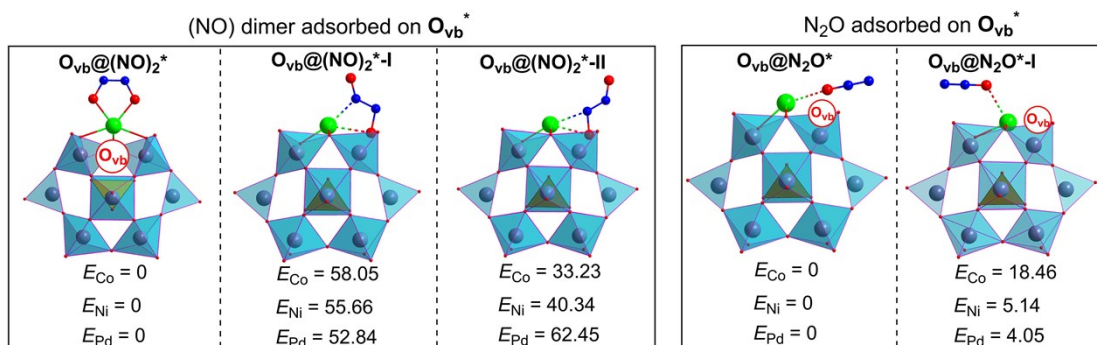

**Fig. S2.** The adsorption model of NO dimer and  $N_2O$  molecules on  $O_{vb}$ -based Co, Ni and Pd SACs with corresponding relative energies (kcal/mol).

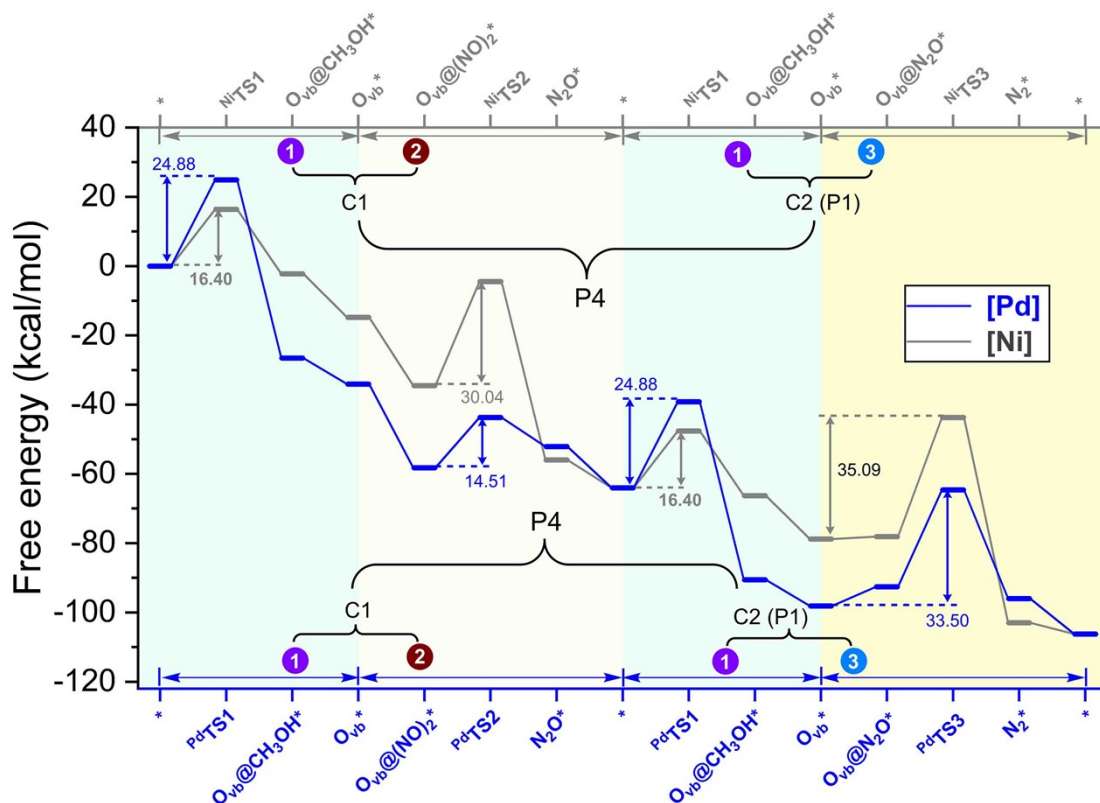

Fig. S3. Calculated free energy profiles of P1 and P4 over Ni and Pd system (kcal/mol).

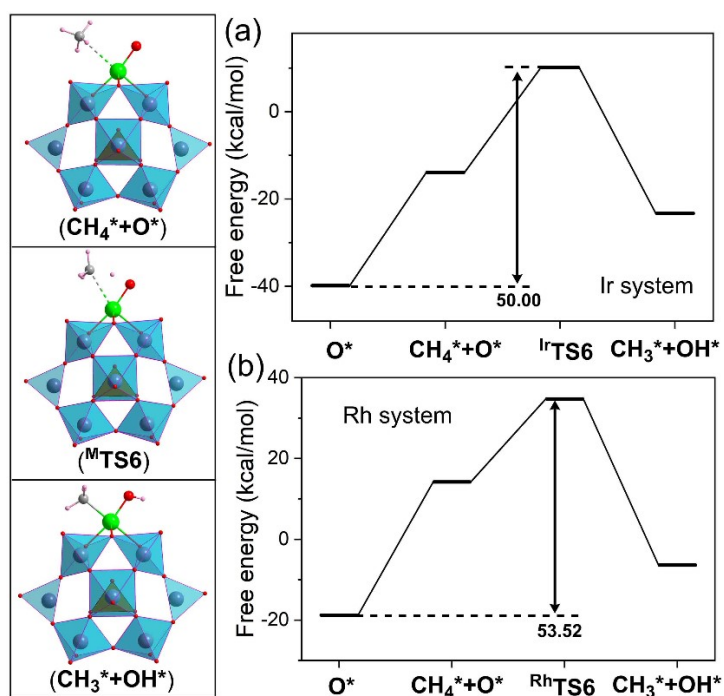

Fig. S4. Calculated free energy profiles of precursor-mediated mechanism in reaction 5 over Rh and Ir system (kcal/mol).

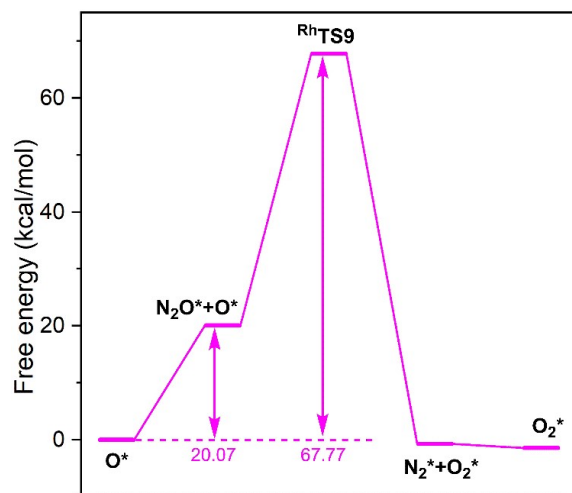

**Fig. S5.** Reaction 6 for  $Rh_1/PTA$  SACs.

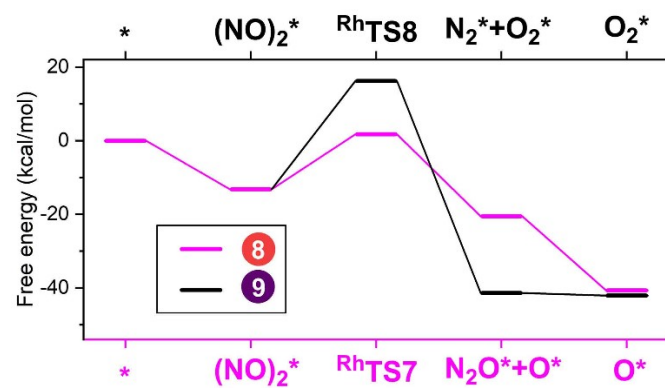

**Fig. S6.** Calculated free energy profiles of reaction 8 and 9 over  $Rh_1/PTA$ .

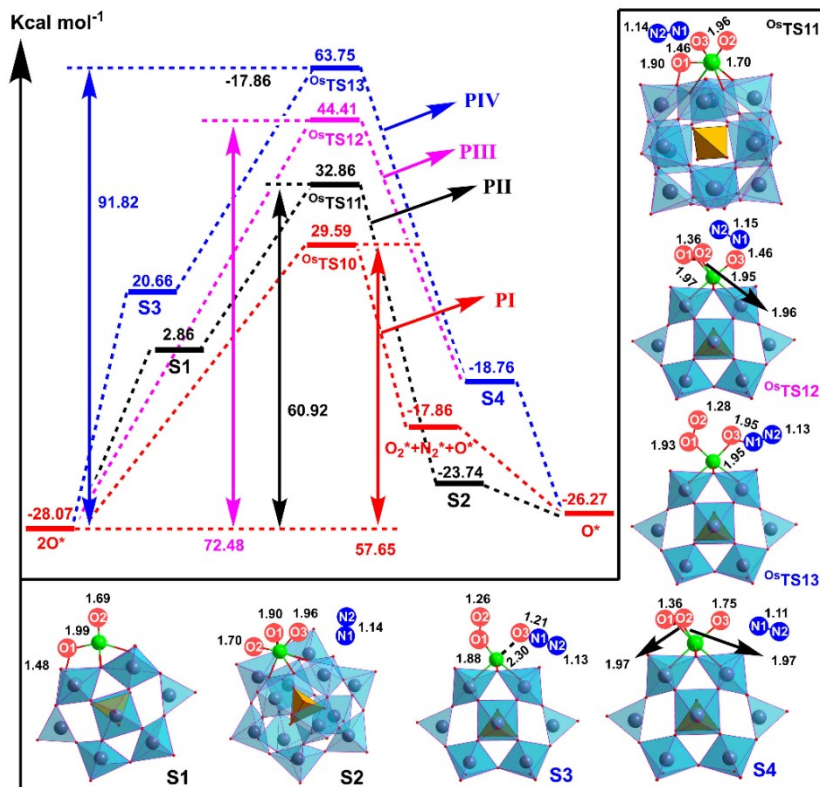

Fig. S7. The direct N<sub>2</sub>O dissociation on 2O@Os<sub>1</sub>/PTA SACs (kcal/mol).

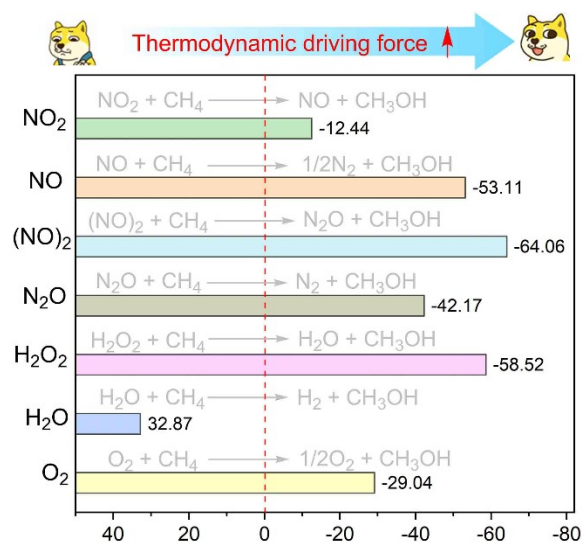

Figure S8. Reaction energies of DSCMM by various oxidants (kcal/mol).

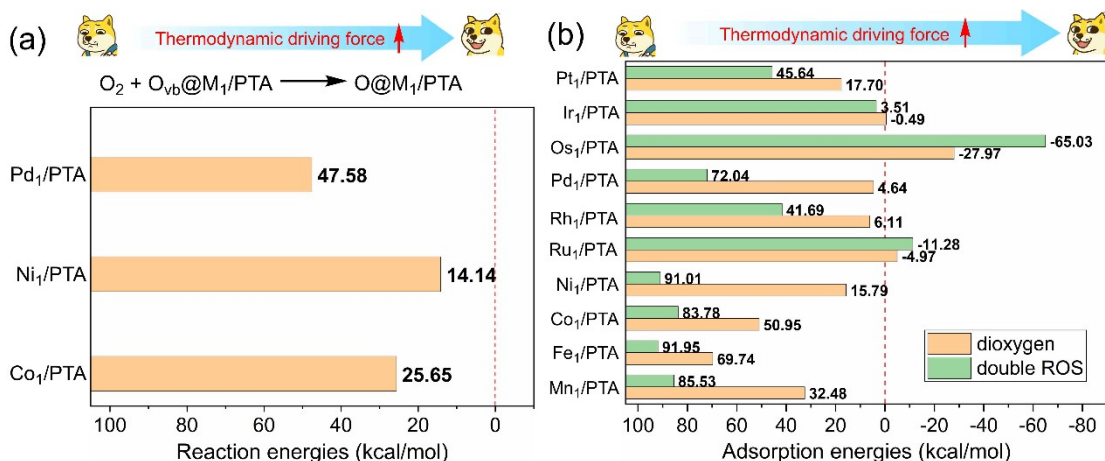

**Fig. S9.** (a) Adsorption energies of dioxygen or double ROS over M<sub>1</sub>/PTA SACs. (b)  $E_r$  of replenishing oxygen vacancy with O<sub>2</sub> for Co, Ni and Pd systems.

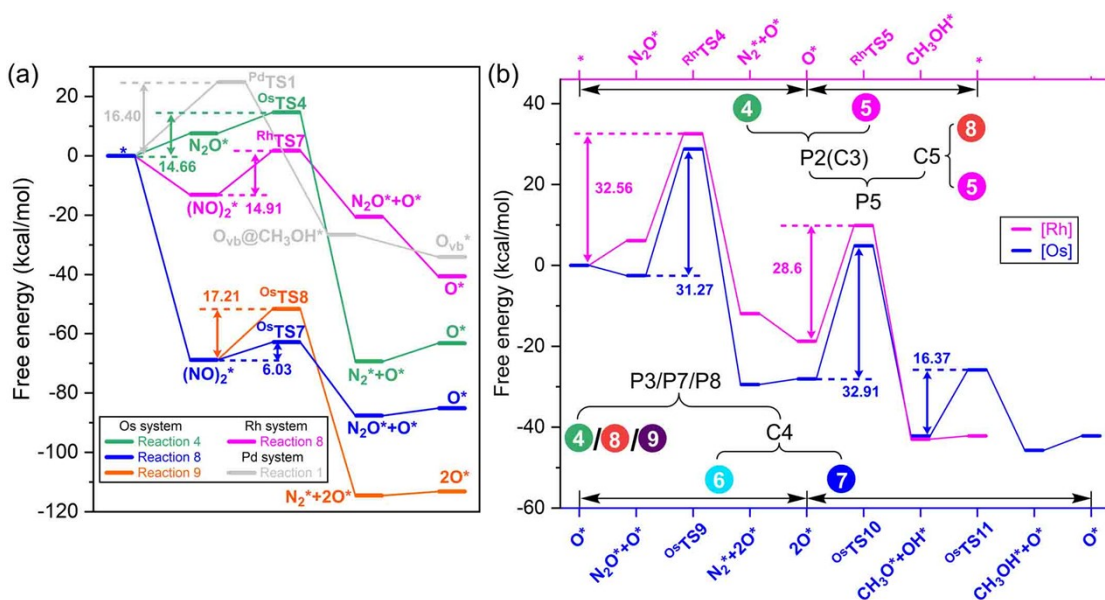

**Fig. S10.** (a) Calculated free energy profiles of reaction 8 of Rh<sub>1</sub>/PTA, reaction 1 of Pd<sub>1</sub>/PTA and reactions 1, 3 and 4 of Os<sub>1</sub>/PTA SACs, respectively. (b) Calculated free energy profiles of C3 over Rh system, and C4 over Os system, respectively.

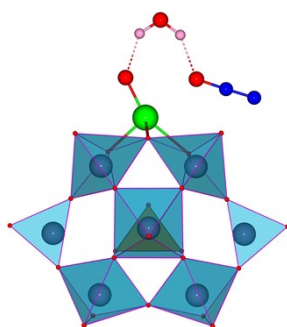

**Fig. S11.** Hydrogen bonding cooperativity of N<sub>2</sub>O⋯HOH⋯O@M<sub>1</sub>/PTA.

**Table S1.** DFT-derived single point energy (kcal/mol) for the clean M<sub>1</sub>/PTA and adsorption complexes with one CH<sub>4</sub>, one CH<sub>3</sub>OH, one O<sub>2</sub>, one a dissociative adsorption state of O<sub>2</sub> (<sup>d</sup>O<sub>2</sub>), one N<sub>2</sub>, one N-end N<sub>2</sub>O, one O-end N<sub>2</sub>O and two complexed NO ((NO)<sub>2</sub>) with different spin states

| M <sub>1</sub> /POM            | Spin multiplicity | Total energy (a.u.) | Total energy (kcal/mol) | Relative energy (kcal/mol) |
|--------------------------------|-------------------|---------------------|-------------------------|----------------------------|
| <b>Clean M<sub>1</sub>/POM</b> |                   |                     |                         |                            |
| Mn-PTA                         | 1                 | -4270.5197          | -2679793.8220           | 56.5126                    |
|                                | 3                 | -4270.5658          | -2679822.7150           | 27.6196                    |
|                                | 5                 | -4270.6098          | -2679850.3350           | 0.0000                     |
| Fe-PTA                         | 2                 | -4290.0626          | -2692057.1800           | 16.5990                    |
|                                | 4                 | -4290.0890          | -2692073.7500           | 0.0292                     |
|                                | 6                 | -4290.0890          | -2692073.7790           | 0.0000                     |
| Co-PTA                         | 1                 | -4311.6939          | -2705631.0430           | 8.9823                     |
|                                | 3                 | -4311.7082          | -2705640.0250           | 0.0000                     |
|                                | 5                 | -4311.6818          | -2705623.4190           | 16.6061                    |
| Ni-PTA                         | 2                 | -4335.9193          | -2720832.7008           | 0.0000                     |
|                                | 4                 | -4335.8915          | -2720815.2941           | 17.4068                    |
| Ru-PTA                         | 2                 | -4260.4496          | -2673474.7420           | 0.0000                     |
|                                | 4                 | -4260.4460          | -2673472.4580           | 2.2840                     |
|                                | 6                 | -4260.4246          | -2673459.0440           | 15.6981                    |
| Rh-PTA                         | 1                 | -4276.0667          | -2683274.5860           | 0.0000                     |
|                                | 3                 | -4276.0660          | -2683274.1740           | 0.4128                     |
|                                | 5                 | -4276.0370          | -2683255.9940           | 18.5918                    |
| Pd-PTA                         | 2                 | -4293.2793          | -2694075.7160           | 0.0000                     |
|                                | 4                 | -4293.2793          | -2694075.7150           | 0.0005                     |
| Os-PTA                         | 2                 | -4257.5725          | -2671669.2940           | 0.0000                     |
|                                | 4                 | -4257.5715          | -2671668.6640           | 0.6307                     |
|                                | 6                 | -4257.5390          | -2671648.3000           | 20.9946                    |
| Ir-PTA                         | 1                 | -4271.2155          | -2680230.4690           | 0.0000                     |
|                                | 3                 | -4271.2179          | -2680231.9620           | -1.4930                    |
|                                | 5                 | -4271.1670          | -2680199.9980           | 30.4708                    |
| Pt-PTA                         | 2                 | -4285.6571          | -2689292.7050           | 0.0000                     |
|                                | 4                 | -4285.6257          | -2689272.9750           | 19.7300                    |
| <b>One CH<sub>4</sub></b>      |                   |                     |                         |                            |
| Mn-PTA                         | 1                 | -4311.0386          | -2705219.8354           | 58.4473                    |
|                                | 3                 | -4311.0786          | -2705244.9238           | 33.3588                    |
|                                | 5                 | -4311.1317          | -2705278.2826           | 0.0000                     |
| Fe-PTA                         | 2                 | -4330.5811          | -2717482.9155           | 23.1297                    |
|                                | 4                 | -4330.6069          | -2717499.1277           | 6.9176                     |
|                                | 6                 | -4330.6179          | -2717506.0452           | 0.0000                     |
| Co-PTA                         | 1                 | -4352.2065          | -2731053.0883           | 8.5810                     |

|                             |   |            |               |         |
|-----------------------------|---|------------|---------------|---------|
|                             | 3 | -4352.2202 | -2731061.6693 | 0.0000  |
|                             | 5 | -4352.2105 | -2731055.5974 | 6.0719  |
| Ni-PTA                      | 2 | -4376.4340 | -2746256.1021 | 0.0000  |
|                             | 4 | -4376.4127 | -2746242.7095 | 13.3927 |
| Ru-PTA                      | 2 | -4300.9724 | -2698903.1794 | 0.0000  |
|                             | 4 | -4300.9665 | -2698899.5047 | 3.6747  |
|                             | 6 | -4300.9471 | -2698887.3417 | 15.8377 |
| Rh-PTA                      | 1 | -4316.5899 | -2708703.2978 | 0.0000  |
|                             | 3 | -4316.5833 | -2708699.1956 | 4.1023  |
|                             | 5 | -4316.5592 | -2708684.0577 | 19.2401 |
| Pd-PTA                      | 2 | -4333.7960 | -2719500.3342 | 0.0000  |
|                             | 4 | -4333.7855 | -2719493.7412 | 6.5931  |
| Os-PTA                      | 2 | -4298.0942 | -2697097.0659 | 0.0000  |
|                             | 4 | -4298.0825 | -2697089.7198 | 7.3461  |
|                             | 6 | -4298.0506 | -2697069.7007 | 27.3652 |
| Ir-PTA                      | 1 | -4311.7395 | -2705659.6409 | 0.0000  |
|                             | 3 | -4311.7311 | -2705654.3650 | 5.2760  |
|                             | 5 | -4311.6888 | -2705627.8242 | 31.8167 |
| Pt-PTA                      | 2 | -4326.1690 | -2714714.3308 | 0.0000  |
|                             | 4 | -4326.1460 | -2714699.9019 | 14.4290 |
| <b>One CH<sub>3</sub>OH</b> |   |            |               |         |
| Mn-PTA                      | 1 | -4386.2722 | -2752429.6888 | 54.1157 |
|                             | 3 | -4386.3186 | -2752458.8050 | 24.9994 |
|                             | 5 | -4386.3585 | -2752483.8044 | 0.0000  |
| Fe-PTA                      | 2 | -4405.8165 | -2764693.9073 | 22.2814 |
|                             | 4 | -4405.8379 | -2764707.3573 | 8.8313  |
|                             | 6 | -4405.8520 | -2764716.1886 | 0.0000  |
| Co-PTA                      | 1 | -4427.4464 | -2778266.8592 | 4.3867  |
|                             | 3 | -4427.4533 | -2778271.2459 | 0.0000  |
|                             | 5 | -4427.4452 | -2778266.1316 | 5.1144  |
| Ni-PTA                      | 2 | -4451.6627 | -2793462.8404 | 0.0000  |
|                             | 4 | -4451.6474 | -2793453.2325 | 9.6079  |
| Ru-PTA                      | 2 | -4376.2047 | -2746112.1989 | 0.0000  |
|                             | 4 | -4376.1983 | -2746108.2014 | 3.9975  |
|                             | 6 | -4376.1785 | -2746095.7975 | 16.4014 |
| Rh-PTA                      | 1 | -4391.8232 | -2755912.9755 | 0.0000  |
|                             | 3 | -4391.8143 | -2755907.4193 | 5.5562  |
|                             | 5 | -4391.7875 | -2755890.5780 | 22.3975 |
| Pd-PTA                      | 2 | -4409.0289 | -2766709.7060 | 0.0000  |
|                             | 4 | -4409.0125 | -2766699.4125 | 10.2935 |
| Os-PTA                      | 2 | -4373.3288 | -2744307.5345 | 0.0000  |
|                             | 4 | -4373.3202 | -2744302.1506 | 5.3840  |
|                             | 6 | -4373.2867 | -2744281.1120 | 26.4226 |
| Ir-PTA                      | 1 | -4386.9724 | -2752869.0543 | 0.0000  |



|                          |   |            |               |         |
|--------------------------|---|------------|---------------|---------|
|                          | 3 | -4386.9668 | -2752865.5407 | 3.5136  |
|                          | 5 | -4386.9229 | -2752837.9668 | 31.0875 |
| Pt-PTA                   | 2 | -4401.4041 | -2761925.1064 | 0.0000  |
|                          | 4 | -4401.3761 | -2761907.5475 | 17.5590 |
| <b>One N<sub>2</sub></b> |   |            |               |         |
| Mn-PTA                   | 1 | -4380.0636 | -2748533.7063 | 49.9424 |
|                          | 3 | -4380.0985 | -2748555.6081 | 28.0407 |
|                          | 5 | -4380.1432 | -2748583.6488 | 0.0000  |
| Fe-PTA                   | 2 | -4399.5949 | -2760789.7788 | 21.1710 |
|                          | 4 | -4399.6184 | -2760804.5522 | 6.3976  |
|                          | 6 | -4399.6286 | -2760810.9498 | 0.0000  |
| Co-PTA                   | 1 | -4421.2282 | -2774364.8859 | 4.0361  |
|                          | 3 | -4421.2346 | -2774368.9220 | 0.0000  |
|                          | 5 | -4421.2213 | -2774360.5770 | 8.3450  |
| Ni-PTA                   | 2 | -4445.4461 | -2789561.9059 | 0.0000  |
|                          | 4 | -4445.4270 | -2789549.9140 | 11.9919 |
| Ru-PTA                   | 2 | -4369.9976 | -2742217.1706 | 0.0000  |
|                          | 4 | -4369.9826 | -2742207.7624 | 9.4082  |
|                          | 6 | -4369.9590 | -2742192.9927 | 24.1779 |
| Rh-PTA                   | 1 | -4385.6141 | -2752016.7319 | 0.0000  |
|                          | 3 | -4385.6020 | -2752009.0868 | 7.6452  |
|                          | 5 | -4385.5710 | -2751989.6575 | 27.0744 |
| Pd-PTA                   | 2 | -4402.8130 | -2762809.1605 | 0.0000  |
|                          | 4 | -4402.7984 | -2762800.0530 | 9.1075  |
| Os-PTA                   | 2 | -4367.1342 | -2740420.3953 | 0.0000  |
|                          | 4 | -4367.1122 | -2740406.5841 | 13.8112 |
|                          | 6 | -4367.0668 | -2740378.0932 | 42.3021 |
| Ir-PTA                   | 1 | -4380.7768 | -2748981.2716 | 0.0000  |
|                          | 3 | -4380.7618 | -2748971.8670 | 9.4046  |
|                          | 5 | -4380.7074 | -2748937.6719 | 43.5997 |
| Pt-PTA                   | 2 | -4395.1938 | -2758028.0595 | 0.0000  |
|                          | 4 | -4395.1620 | -2758008.1316 | 19.9279 |
| <b>O<sub>2</sub></b>     |   |            |               |         |
| Mn-PTA                   | 1 | -4420.8847 | -2774149.3833 | 36.8423 |
|                          | 3 | -4420.9435 | -2774186.2256 | 0.0000  |
|                          | 5 | -4420.9366 | -2774181.9485 | 4.2771  |
|                          | 7 | -4420.9285 | -2774176.8615 | 9.3641  |
| Fe-PTA                   | 2 | -4440.4138 | -2786404.0920 | 2.1023  |
|                          | 4 | -4440.4172 | -2786406.1943 | 0.0000  |
|                          | 6 | -4440.4073 | -2786399.9535 | 6.2408  |
|                          | 8 | -4440.4108 | -2786402.1646 | 4.0298  |
| Co-PTA                   | 1 | -4461.9977 | -2799948.1889 | 16.1989 |
|                          | 3 | -4462.0234 | -2799964.3206 | 0.0672  |
|                          | 5 | -4462.0235 | -2799964.3878 | 0.0000  |

|                                      |   |            |               |         |
|--------------------------------------|---|------------|---------------|---------|
|                                      | 7 | -4462.0027 | -2799951.3203 | 13.0675 |
| Ni-PTA                               | 2 | -4486.2364 | -2815158.1850 | 0.0000  |
|                                      | 4 | -4486.2349 | -2815157.2646 | 0.9204  |
|                                      | 6 | -4486.2039 | -2815137.7959 | 20.3891 |
|                                      |   |            |               |         |
| Ru-PTA                               | 2 | -4410.7971 | -2767819.3192 | 3.1378  |
|                                      | 4 | -4410.8021 | -2767822.4570 | 0.0000  |
|                                      | 6 | -4410.7607 | -2767796.4531 | 26.0039 |
|                                      | 8 | -4410.7424 | -2767784.9920 | 37.4650 |
| Rh-PTA                               | 1 | -4426.3888 | -2777603.2325 | 2.8060  |
|                                      | 3 | -4426.3933 | -2777606.0384 | 0.0000  |
|                                      | 5 | -4426.3833 | -2777599.7644 | 6.2740  |
|                                      | 7 | -4426.3548 | -2777581.8780 | 24.1605 |
| Pd-PTA                               | 2 | -4443.6014 | -2788404.3418 | 0.0000  |
|                                      | 4 | -4443.5959 | -2788400.8323 | 3.5095  |
|                                      | 6 | -4443.5829 | -2788392.7357 | 11.6061 |
| Os-PTA                               | 2 | -4407.9381 | -2766025.2405 | 9.3208  |
|                                      | 4 | -4407.9530 | -2766034.5613 | 0.0000  |
|                                      | 6 | -4407.8934 | -2765997.1740 | 37.3873 |
|                                      | 8 | -4407.8132 | -2765946.8318 | 50.3422 |
| Ir-PTA                               | 1 | -4421.5542 | -2774569.4674 | 2.2772  |
|                                      | 3 | -4421.5578 | -2774571.7445 | 0.0000  |
|                                      | 5 | -4421.5321 | -2774555.6349 | 16.1097 |
|                                      |   | -4421.4821 | -2774524.2555 | 47.4890 |
| Pt-PTA                               | 2 | -4435.9813 | -2783622.6095 | 0.0000  |
|                                      | 4 | -4435.9539 | -2783605.4219 | 17.1876 |
|                                      | 6 | -4435.9431 | -2783598.6380 | 23.9715 |
| <b>One <sup>d</sup>O<sub>2</sub></b> |   |            |               |         |
| Mn-PTA                               | 5 | -4420.8458 | -2774124.9618 | 0.0000  |
| Fe-PTA                               | 6 | -4440.3450 | -2786360.9192 | 0.0000  |
| Co-PTA                               | 3 | -4461.9173 | -2799897.6946 | 16.2994 |
|                                      | 5 | -4461.9432 | -2799913.9940 | 0.0000  |
| Ni-PTA                               | 4 | -4486.1176 | -2815083.6789 | 0.0000  |
| Ru-PTA                               | 2 | -4410.8041 | -2767823.6923 | 0.0000  |
|                                      | 4 | -4410.7906 | -2767815.1978 | 8.4945  |
|                                      | 6 | -4410.7428 | -2767785.2169 | 38.4753 |
| Rh-PTA                               | 1 | -4426.3270 | -2777564.4697 | 15.3208 |
|                                      | 3 | -4426.3220 | -2777561.2972 | 18.4933 |
|                                      | 5 | -4426.3514 | -2777579.7905 | 0.0000  |
| Pd-PTA                               | 2 | -4443.4957 | -2788337.9639 | 5.0241  |
|                                      | 4 | -4443.5037 | -2788342.9880 | 0.0000  |
|                                      | 6 | -4443.4988 | -2788339.9405 | 3.0475  |
| Os-PTA                               | 2 | -4408.0300 | -2766082.9352 | 0.0000  |
|                                      | 4 | -4407.9888 | -2766057.0818 | 25.8534 |
|                                      | 6 | -4407.9082 | -2766006.4547 | 50.6270 |

|                                 |   |            |               |         |
|---------------------------------|---|------------|---------------|---------|
| Ir-PTA                          | 1 | -4421.5749 | -2774582.4848 | 1.0737  |
|                                 | 3 | -4421.5766 | -2774583.5584 | 0.0000  |
|                                 | 5 | -4421.5609 | -2774573.6985 | 9.8599  |
| Pt-PTA                          | 2 | -4435.9242 | -2783586.8115 | 0.0000  |
|                                 | 4 | -4435.9186 | -2783583.2977 | 3.5138  |
| <b>One N-end N<sub>2</sub>O</b> |   |            |               |         |
| Mn-PTA                          | 1 | -4455.2093 | -2795688.3821 | 52.6121 |
|                                 | 3 | -4455.2479 | -2795712.5910 | 28.4033 |
|                                 | 5 | -4455.2931 | -2795740.9942 | 0.0000  |
| Fe-PTA                          | 2 | -4474.7457 | -2807947.6920 | 22.1571 |
|                                 | 4 | -4474.7689 | -2807962.2055 | 7.6436  |
|                                 | 6 | -4474.7810 | -2807969.8491 | 0.0000  |
| Co-PTA                          | 1 | -4496.3756 | -2821520.6568 | 4.8708  |
|                                 | 3 | -4496.3834 | -2821525.5277 | 0.0000  |
|                                 | 5 | -4496.3738 | -2821519.5131 | 6.0146  |
| Ni-PTA                          | 2 | -4520.5949 | -2836718.5316 | 0.0000  |
|                                 | 4 | -4520.5778 | -2836707.7592 | 10.7724 |
| Ru-PTA                          | 2 | -4445.1420 | -2789371.0533 | 0.0000  |
|                                 | 4 | -4445.1321 | -2789364.8186 | 6.2347  |
|                                 | 6 | -4445.1103 | -2789351.1787 | 19.8747 |
| Rh-PTA                          | 1 | -4460.7587 | -2799170.7027 | 0.0000  |
|                                 | 3 | -4460.7499 | -2799165.1874 | 5.5153  |
|                                 | 5 | -4460.7227 | -2799148.1258 | 22.5768 |
| Pd-PTA                          | 2 | -4477.9615 | -2809965.6380 | 0.0000  |
|                                 | 4 | -4477.9494 | -2809958.0531 | 7.5849  |
| Os-PTA                          | 2 | -4442.2722 | -2787570.2489 | 0.0000  |
|                                 | 4 | -4442.2570 | -2787560.6843 | 9.5646  |
|                                 | 6 | -4442.2181 | -2787536.3038 | 33.9451 |
| Ir-PTA                          | 1 | -4455.9145 | -2796130.9187 | 0.0000  |
|                                 | 3 | -4455.9042 | -2796124.4498 | 6.4690  |
|                                 | 5 | -4455.8565 | -2796094.4829 | 36.4359 |
| Pt-PTA                          | 2 | -4470.3383 | -2805182.0150 | 0.0000  |
|                                 | 4 | -4470.3124 | -2805165.7237 | 16.2913 |
| <b>One O-end N<sub>2</sub>O</b> |   |            |               |         |
| Mn-PTA                          | 1 | -4455.2037 | -2795684.8693 | 54.4736 |
|                                 | 3 | -4455.2417 | -2795708.7451 | 30.5977 |
|                                 | 5 | -4455.2905 | -2795739.3429 | 0.0000  |
| Fe-PTA                          | 2 | -4474.7425 | -2807945.6709 | 21.5598 |
|                                 | 4 | -4474.7662 | -2807960.5221 | 6.7085  |
|                                 | 6 | -4474.7769 | -2807967.2307 | 0.0000  |
| Co-PTA                          | 1 | -4496.3716 | -2821518.1142 | 4.9244  |
|                                 | 3 | -4496.3794 | -2821523.0386 | 0.0000  |
|                                 | 5 | -4496.3693 | -2821516.6767 | 6.3619  |
| Ni-PTA                          | 2 | -4520.5940 | -2836717.9409 | 0.0000  |

|                         |   |            |               |         |
|-------------------------|---|------------|---------------|---------|
|                         | 4 | -4520.5750 | -2836706.0472 | 11.8937 |
| Ru-PTA                  | 2 | -4445.1361 | -2789367.3385 | 0.0000  |
|                         | 4 | -4445.1266 | -2789361.3834 | 5.9551  |
|                         | 6 | -4445.1065 | -2789348.7920 | 18.5465 |
| Rh-PTA                  | 1 | -4460.7527 | -2799166.9005 | 0.0000  |
|                         | 3 | -4460.7456 | -2799162.4768 | 4.4237  |
|                         | 5 | -4460.7183 | -2799145.3293 | 21.5712 |
| Pd-PTA                  | 2 | -4477.9574 | -2809963.0435 | 0.0000  |
|                         | 4 | -4477.9456 | -2809955.6490 | 7.3945  |
| Os-PTA                  | 2 | -4442.2576 | -2787561.0973 | 0.0000  |
|                         | 4 | -4442.2437 | -2787552.3441 | 8.7532  |
|                         | 6 | -4442.2112 | -2787531.9332 | 29.1641 |
| Ir-PTA                  | 1 | -4455.9012 | -2796122.5334 | 0.0000  |
|                         | 3 | -4455.8938 | -2796117.9133 | 4.6201  |
|                         | 5 | -4455.8473 | -2796088.7366 | 33.7967 |
| Pt-PTA                  | 2 | -4470.3307 | -2805177.2209 | 0.0000  |
|                         | 4 | -4470.3065 | -2805162.0255 | 15.1954 |
| <b>(NO)<sub>2</sub></b> |   |            |               |         |
| Mn-PTA                  | 1 | -4530.3860 | -2842862.5468 | 17.5437 |
|                         | 3 | -4530.4140 | -2842880.0905 | 0.0000  |
|                         | 5 | -4530.3995 | -2842870.9695 | 9.1210  |
| Fe-PTA                  | 2 | -4549.8864 | -2855099.1859 | 7.9874  |
|                         | 4 | -4549.8961 | -2855105.3036 | 1.8697  |
|                         | 6 | -4549.8991 | -2855107.1733 | 0.0000  |
| Co-PTA                  | 1 | -4571.4909 | -2868656.2461 | 3.1853  |
|                         | 3 | -4571.4960 | -2868659.4314 | 0.0000  |
| Ni-PTA                  | 2 | -4595.6873 | -2883839.7233 | 0.0000  |
|                         | 4 | -4595.6710 | -2883829.5118 | 10.2115 |
| Ru-PTA                  | 2 | -4520.3073 | -2836538.0327 | 0.0000  |
|                         | 4 | -4520.2833 | -2836522.9531 | 15.0797 |
|                         | 6 | -4520.2283 | -2836488.4499 | 49.5829 |
| Rh-PTA                  | 1 | -4535.8877 | -2846314.8939 | 0.6028  |
|                         | 3 | -4535.8887 | -2846315.4968 | 0.0000  |
|                         | 5 | -4535.8388 | -2846284.2336 | 31.2632 |
| Pd-PTA                  | 2 | -4553.0702 | -2857097.1118 | 0.0000  |
|                         | 4 | -4553.0532 | -2857086.3880 | 10.7239 |
| Os-PTA                  | 2 | -4517.4784 | -2834762.8869 | 0.0000  |
|                         | 4 | -4517.4511 | -2834745.7215 | 17.1655 |
|                         | 6 | -4517.3699 | -2834694.8151 | 68.0718 |
| Ir-PTA                  | 1 | -4531.0810 | -2843298.6104 | 0.0000  |
|                         | 3 | -4531.0722 | -2843293.1144 | 5.4960  |
|                         | 5 | -4531.0152 | -2843257.3581 | 41.2523 |
| Pt-PTA                  | 2 | -4545.4736 | -2852330.1078 | 0.0000  |
|                         | 4 | -4545.4481 | -2852314.1625 | 15.9452 |

| <b>One N-end NO</b> |   |           |              |        |
|---------------------|---|-----------|--------------|--------|
| Mn-PTA              | 2 | -4400.521 | -2761370.979 | 0.000  |
|                     | 4 | -4400.521 | -2761370.839 | 0.139  |
|                     | 6 | -4400.502 | -2761358.913 | 12.066 |
| Fe-PTA              | 1 | -4420.013 | -2773602.314 | 3.103  |
|                     | 3 | -4420.018 | -2773605.417 | 0.000  |
|                     | 5 | -4420.006 | -2773597.997 | 7.420  |
| Co-PTA              | 2 | -4441.635 | -2787170.600 | 0.000  |
|                     | 4 | -4441.613 | -2787156.883 | 13.717 |
|                     | 6 | -4441.581 | -2787136.603 | 33.997 |
| Ni-PTA              | 1 | -4465.845 | -2802362.460 | 0.000  |
|                     | 3 | -4465.818 | -2802345.641 | 16.819 |
| Ru-PTA              | 1 | -4390.432 | -2755040.059 | 0.000  |
|                     | 3 | -4390.409 | -2755025.722 | 14.337 |
|                     | 5 | -4390.368 | -2754999.528 | 40.530 |
| Rh-PTA              | 2 | -4406.014 | -2764817.885 | 0.000  |
|                     | 4 | -4405.991 | -2764803.116 | 14.769 |
|                     | 6 | -4405.933 | -2764767.022 | 50.864 |
| Pd-PTA              | 1 | -4423.216 | -2775611.968 | 0.000  |
|                     | 3 | -4423.204 | -2775604.819 | 7.149  |
| Os-PTA              | 1 | -4387.589 | -2753256.201 | 0.000  |
|                     | 3 | -4387.566 | -2753241.387 | 14.814 |
|                     | 5 | -4387.501 | -2753200.988 | 55.213 |
| Ir-PTA              | 2 | -4401.193 | -2761792.412 | 0.000  |
|                     | 4 | -4401.148 | -2761764.603 | 27.810 |
|                     | 6 | -4401.064 | -2761711.441 | 80.971 |
| Pt-PTA              | 1 | -4415.594 | -2770829.634 | 0.000  |
|                     | 3 | -4415.583 | -2770822.566 | 7.068  |
| <b>One O-end NO</b> |   |           |              |        |
| Mn-PTA              | 2 | -4400.477 | -2761343.354 | 17.679 |
|                     | 4 | -4400.505 | -2761361.032 | 0.000  |
|                     | 6 | -4400.499 | -2761357.250 | 3.783  |
| Fe-PTA              | 1 | -4419.961 | -2773569.904 | 18.949 |
|                     | 3 | -4419.987 | -2773586.098 | 2.755  |
|                     | 5 | -4419.991 | -2773588.853 | 0.000  |
| Co-PTA              | 2 | -4441.605 | -2787151.823 | 0.000  |
|                     | 4 | -4441.585 | -2787138.693 | 13.130 |
|                     | 6 | -4441.574 | -2787131.898 | 19.926 |
| Ni-PTA              | 1 | -4465.826 | -2802350.332 | 0      |
|                     | 3 | -4465.797 | -2802332.402 | 17.930 |
| Ru-PTA              | 1 | -4390.369 | -2755000.461 | 0.000  |
|                     | 3 | -4390.358 | -2754993.248 | 7.213  |
|                     | 5 | -4390.342 | -2754983.209 | 17.252 |
| Rh-PTA              | 2 | -4405.976 | -2764793.985 | 0.000  |

|        |   |           |              |        |
|--------|---|-----------|--------------|--------|
|        | 4 | -4405.963 | -2764785.670 | 8.315  |
|        | 6 | -4405.927 | -2764763.034 | 30.951 |
| Pd-PTA | 1 | -4423.205 | -2775605.102 | 0.000  |
|        | 3 | -4423.192 | -2775597.320 | 7.782  |
| Os-PTA | 1 | -4387.504 | -2753202.513 | 0.000  |
|        | 3 | -4387.490 | -2753193.643 | 8.870  |
|        | 5 | -4387.464 | -2753177.504 | 25.009 |
| Ir-PTA | 2 | -4401.119 | -2761746.086 | 0.000  |
|        | 4 | -4401.110 | -2761740.233 | 5.854  |
|        | 6 | -4401.058 | -2761707.819 | 38.268 |
| Pt-PTA | 1 | -4415.563 | -2770810.218 | 0.000  |
|        | 3 | -4415.548 | -2770800.648 | 9.570  |

**Table S2.** The relative energies (kcal/mol) and key geometry parameters of each state.

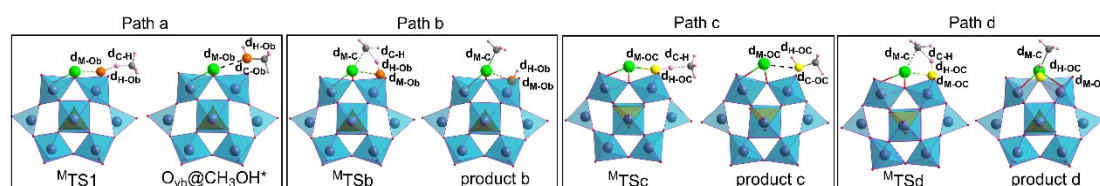

|                                         | Co                | Ni    | Pd     |       |
|-----------------------------------------|-------------------|-------|--------|-------|
| Relative energies                       |                   |       |        |       |
| Path a                                  |                   |       |        |       |
| *                                       | 0.00              | 0.00  | 0.00   |       |
| <b>M<sub>TS1</sub></b>                  | 10.100            | 16.40 | 24.88  |       |
| <b>O<sub>vb</sub>@CH<sub>3</sub>OH*</b> | 4.46              | -2.25 | -26.55 |       |
| Path b                                  |                   |       |        |       |
| <b>M<sub>TSb</sub></b>                  | 40.92             | 32.47 | 28.73  |       |
| <b>Product b</b>                        | -1.15             | 10.61 | 25.58  |       |
| Path c                                  |                   |       |        |       |
| <b>M<sub>TS<sub>c</sub></sub></b>       | 52.53             |       | 68.58  |       |
| <b>Product c</b>                        | 7.98              |       | -5.07  |       |
| Path d                                  |                   |       |        |       |
| <b>M<sub>TS<sub>d</sub></sub></b>       | 55.30             |       | 42.14  |       |
| <b>Product d</b>                        | 29.63             |       | -3.06  |       |
|                                         | Co                | Ni    | Pd     |       |
| Key geometry parameters                 |                   |       |        |       |
| Path a                                  |                   |       |        |       |
| <b>M<sub>TS1</sub></b>                  | d <sub>M-Ob</sub> | 1.884 | 1.832  | 2.028 |
|                                         | d <sub>C-H</sub>  | 1.387 | 1.390  | 1.352 |
|                                         | d <sub>H-Ob</sub> | 2.772 | 3.359  | 1.190 |
| <b>O<sub>vb</sub>@CH<sub>3</sub>OH*</b> | d <sub>M-Ob</sub> | 2.067 | 2.099  | 2.282 |
|                                         | d <sub>C-Ob</sub> | 1.59  | 1.459  | 1.451 |
|                                         | d <sub>H-Ob</sub> | 0.974 | 0.974  | 0.973 |
| Path b                                  |                   |       |        |       |
| <b>M<sub>TS<sub>b</sub></sub></b>       | d <sub>M-C</sub>  | 2.085 | 2.071  | 2.216 |
|                                         | d <sub>M-Ob</sub> | 1.884 | 2.010  | 2.189 |
|                                         | d <sub>H-Ob</sub> | 2.772 | 1.267  | 1.307 |
|                                         | d <sub>C-H</sub>  | 1.387 | 1.377  | 1.363 |
| <b>Product b</b>                        | d <sub>M-C</sub>  | 2.004 | 1.939  | 2.034 |
|                                         | d <sub>M-Ob</sub> | 2.072 | 1.970  | 2.149 |
|                                         | d <sub>H-Ob</sub> | 0.975 | 0.975  | 0.978 |
| Path c                                  |                   |       |        |       |
| <b>M<sub>TS<sub>c</sub></sub></b>       | d <sub>M-Oc</sub> | 1.927 |        | 2.211 |
|                                         | d <sub>C-H</sub>  | 1.435 |        | 1.308 |

|                  |            |       |        |       |
|------------------|------------|-------|--------|-------|
|                  | $d_{H-Oc}$ | 1.143 |        | 1.234 |
| <b>Product c</b> | $d_{M-Oc}$ | 2.151 |        | 2.853 |
|                  | $d_{C-Oc}$ | 1.461 |        | 1.475 |
|                  | $d_{H-Oc}$ | 0.975 |        | 0.993 |
|                  |            |       | Path d |       |
| <b>MTSd</b>      | $d_{M-C}$  | 2.085 |        | 2.189 |
|                  | $d_{M-Ob}$ | 1.884 |        | 2.179 |
|                  | $d_{H-Ob}$ | 2.772 |        | 2.802 |
|                  | $d_{C-H}$  | 1.387 |        | 1.397 |
| <b>Product d</b> | $d_{M-C}$  | 1.917 |        | 2.026 |
|                  | $d_{M-Oc}$ | 2.017 |        | 2.158 |
|                  | $d_{H-Oc}$ | 0.974 |        | 0.975 |

---



**Table S3.** The relative energies (kcal/mol) and key geometry parameters of each state of reactions 2 and 3.

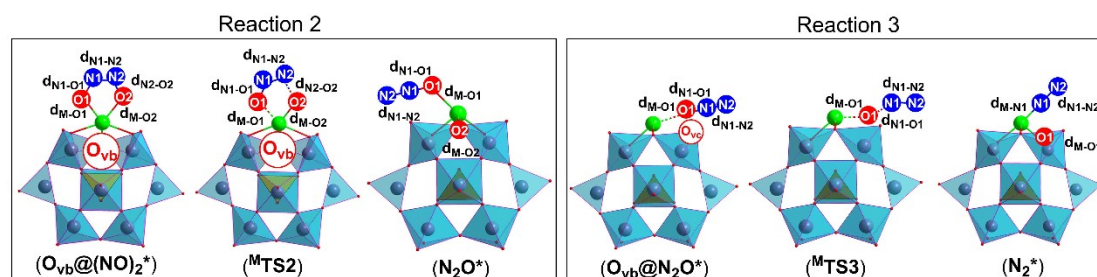

|                         | Co          | Ni     | Pd     |       |
|-------------------------|-------------|--------|--------|-------|
| Relative energies       |             |        |        |       |
| Reaction 2              |             |        |        |       |
| $O_{vb}^*$              | -15.34      | -14.78 | -34.07 |       |
| $O_{vb}@(NO)_2^*$       | -35.38      | -34.49 | -58.26 |       |
| $^M T S 2$              | -13.20      | -4.45  | -43.75 |       |
| $N_2O^*$                | -46.86      | -56.00 | -52.16 |       |
| *                       | -64.06      | -64.06 | -64.06 |       |
| Reaction 3              |             |        |        |       |
| $O_{vb}@N_2O^*$         | -8.21       | -14.10 | -28.52 |       |
| $^M T S 3$              | 39.44       | 20.32  | -0.57  |       |
| $N_2^*$                 | 2.05        | -38.93 | -31.96 |       |
| *                       | -42.17      | -42.17 | -42.17 |       |
|                         | Co          | Ni     | Pd     |       |
| Key geometry parameters |             |        |        |       |
| Reaction 2              |             |        |        |       |
| $O_{vb}@(NO)_2^*$       | $d_{M-O1}$  | 1.792  | 1.953  | 1.988 |
|                         | $d_{M-O2}$  | 1.792  | 1.933  | 1.998 |
|                         | $d_{N1-O1}$ | 1.339  | 1.288  | 1.311 |
|                         | $d_{N2-O2}$ | 1.339  | 1.291  | 1.307 |
|                         | $d_{N1-N2}$ | 1.254  | 1.291  | 1.267 |
| $^M T S 2$              | $d_{M-O1}$  | 1.955  | 1.928  | 2.075 |
|                         | $d_{M-O2}$  | 1.687  | 1.684  | 1.864 |
|                         | $d_{N1-O1}$ | 1.266  | 1.262  | 1.275 |
|                         | $d_{N2-O2}$ | 2.100  | 2.122  | 1.827 |
| $N_2O^*$                | $d_{N1-N2}$ | 1.160  | 1.158  | 1.184 |
|                         | $d_{M-O1}$  | 2.188  | 2.262  | 4.250 |
|                         | $d_{M-O2}$  | 1.921  | 1.890  | 2.135 |
|                         | $d_{N1-O1}$ | 1.204  | 1.201  | 1.169 |
|                         |             |        |        |       |
| $O_{vb}@N_2O^*$         | $d_{M-O1}$  | 2.315  | 2.258  | 2.389 |
|                         | $d_{N1-O1}$ | 1.204  | 1.203  | 1.202 |
| Reaction 3              |             |        |        |       |

|                        |             |       |       |       |
|------------------------|-------------|-------|-------|-------|
|                        | $d_{N1-N2}$ | 1.132 | 1.132 | 1.134 |
| <b><sup>m</sup>Ts3</b> | $d_{M-O1}$  | 2.099 | 1.995 | 2.074 |
|                        | $d_{N1-O1}$ | 1.337 | 1.405 | 1.457 |
|                        | $d_{N1-N2}$ | 1.142 | 1.136 | 1.143 |
| <b>N<sub>2</sub>*</b>  | $d_{M-O1}$  | 1.928 | 1.894 | 2.138 |
|                        | $d_{M-N1}$  | 2.111 | 2.239 | 2.161 |
|                        | $d_{N1-N2}$ | 1.108 | 1.108 | 1.109 |

---

**Table S4.** The relative energies (kcal/mol) and key geometry parameters.

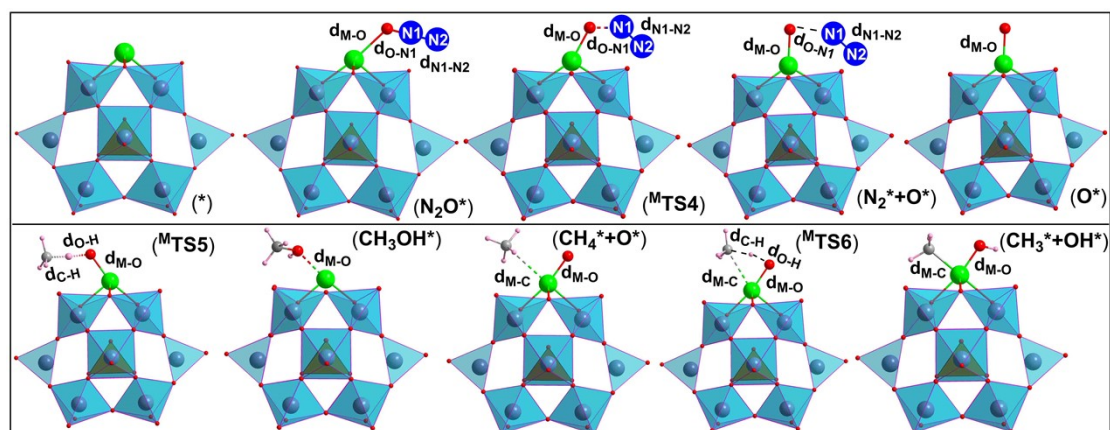

|                            |                    | Rh               | Os     | Ir     |
|----------------------------|--------------------|------------------|--------|--------|
| Relative energies          |                    |                  |        |        |
| *                          |                    | 0.00             | 0.00   | 0.00   |
| <b>N<sub>2</sub>O*</b>     |                    | 6.10             | 7.57   | 10.09  |
| <b>MTS4</b>                |                    | 32.56            | 14.66  | 28.81  |
| <b>N<sub>2</sub>*+O*</b>   |                    | -11.94           | -69.36 | -23.35 |
| <b>O*</b>                  |                    | -18.75           | -63.23 | -39.85 |
| <b>MTS5</b>                |                    | 9.85             |        | 12.11  |
| <b>CH<sub>3</sub>OH*</b>   |                    | -42.97           |        | -42.59 |
| *                          |                    | -42.17           |        | -42.17 |
| <b>CH<sub>4</sub>*+O*</b>  |                    | 14.22            |        | -13.90 |
| <b>MTS6</b>                |                    | 34.77            |        | 10.15  |
| <b>CH<sub>3</sub>*+OH*</b> |                    | -6.35            |        | -23.26 |
|                            |                    | Rh               | Os     | Ir     |
| Key geometry parameters    |                    |                  |        |        |
| <b>N<sub>2</sub>O*</b>     | d <sub>M-O</sub>   | 2.27             | 2.29   | 2.28   |
|                            | d <sub>O-N1</sub>  | 1.21             | 1.21   | 1.21   |
|                            | d <sub>N1-N2</sub> | 1.13             | 1.13   | 1.13   |
| <b>MTS4</b>                | d <sub>M-O</sub>   | 1.90             | 1.96   | 1.95   |
|                            | d <sub>O-N1</sub>  | 1.62             | 1.38   | 1.52   |
|                            | d <sub>N1-N2</sub> | 1.13             | 1.14   | 1.14   |
| <b>N<sub>2</sub>*+O*</b>   | d <sub>M-O</sub>   | 1.78             | 1.68   | 1.70   |
|                            | d <sub>O-N1</sub>  | 4.11             | 5.20   | 2.74   |
|                            | d <sub>N1-N2</sub> | 1.11             | 1.20   | 1.11   |
| <b>O*</b>                  | d <sub>M-O</sub>   | 1.78             | 1.68   | 1.69   |
|                            | <b>MTS5</b>        | d <sub>M-O</sub> | 1.87   |        |
|                            | d <sub>O-H</sub>   | 1.17             |        | 1.07   |
|                            | d <sub>C-H</sub>   | 1.40             |        | 1.43   |
| <b>CH<sub>3</sub>OH*</b>   | d <sub>M-O</sub>   | 2.15             |        | 2.17   |
| <b>CH<sub>4</sub>*+O*</b>  | d <sub>M-O</sub>   | 1.77             |        | 1.79   |

|                            |                  |      |      |
|----------------------------|------------------|------|------|
| <b><sup>m</sup>TS6</b>     | d <sub>M-C</sub> | 2.74 | 2.74 |
|                            | d <sub>M-O</sub> | 1.84 | 1.91 |
|                            | d <sub>O-H</sub> | 1.27 | 1.07 |
|                            | d <sub>C-H</sub> | 1.40 | 1.43 |
| <b>CH<sub>3</sub>*+OH*</b> | d <sub>M-C</sub> | 2.28 | 3.70 |
|                            | d <sub>M-O</sub> | 1.90 | 1.89 |
|                            | d <sub>M-C</sub> | 2.05 | 2.04 |

---

**Table S5.** The relative energies (kcal/mol) and key geometry parameters of each state.

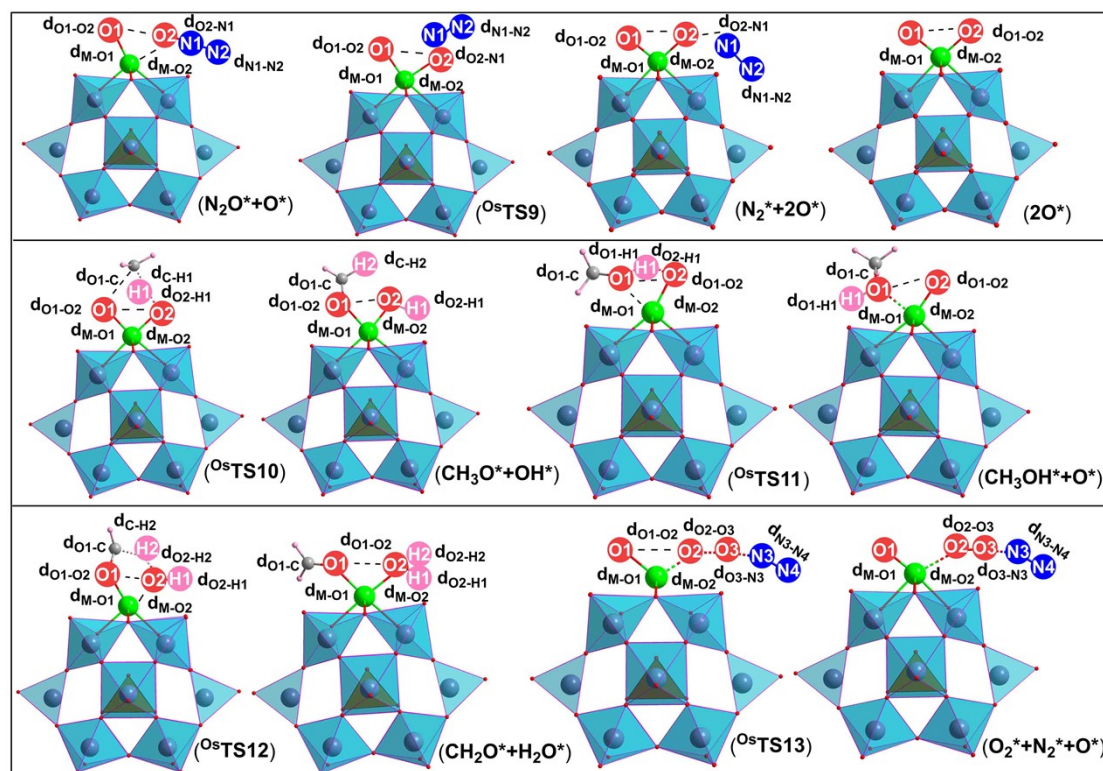

|                                         |                    | Os                                                         |
|-----------------------------------------|--------------------|------------------------------------------------------------|
|                                         |                    | Relative energies                                          |
| <b>O*</b>                               |                    | 0.00                                                       |
| <b>N<sub>2</sub>O*+O*</b>               |                    | -2.51                                                      |
| <b>OsTS9</b>                            |                    | 28.76                                                      |
| <b>N<sub>2</sub>*+2O*</b>               |                    | -29.44                                                     |
| <b>2O*</b>                              |                    | -28.07                                                     |
| <b>OsTS10</b>                           |                    | 4.84                                                       |
| <b>CH<sub>3</sub>O*+OH*</b>             |                    | -42.19                                                     |
|                                         |                    | Methanol-forming pathway                                   |
| <b>OsTS11</b>                           |                    | -25.82                                                     |
| <b>CH<sub>3</sub>O*+OH*</b>             |                    | -45.70                                                     |
|                                         |                    | Water-forming pathway                                      |
| <b>OsTS12</b>                           |                    | -13.69                                                     |
| <b>CH<sub>2</sub>O*+H<sub>2</sub>O*</b> |                    | -34.23                                                     |
|                                         |                    | N <sub>2</sub> O dissociation over 2O@Os <sub>1</sub> /PTA |
| <b>OsTS13</b>                           |                    | 29.59                                                      |
| <b>O<sub>2</sub>*+N<sub>2</sub>*+O*</b> |                    | -17.86                                                     |
| <b>O*</b>                               |                    | -26.27                                                     |
|                                         |                    | Key geometry parameters                                    |
| <b>N<sub>2</sub>O*+O*</b>               | d <sub>M-O1</sub>  | 1.72                                                       |
|                                         | d <sub>M-O2</sub>  | 2.46                                                       |
|                                         | d <sub>O1-O2</sub> | 2.73                                                       |

|                                  |             |      |                          |
|----------------------------------|-------------|------|--------------------------|
|                                  | $d_{O2-N1}$ | 1.20 |                          |
|                                  | $d_{N1-N2}$ | 2.13 |                          |
| <b><math>O^sTS9</math></b>       | $d_{M-O1}$  | 1.71 |                          |
|                                  | $d_{M-O2}$  | 1.97 |                          |
|                                  | $d_{O1-O2}$ | 2.61 |                          |
|                                  | $d_{O2-N1}$ | 1.49 |                          |
|                                  | $d_{N1-N2}$ | 1.14 |                          |
| <b><math>N_2^*+2O^*</math></b>   | $d_{M-O1}$  | 1.73 |                          |
|                                  | $d_{M-O2}$  | 1.73 |                          |
|                                  | $d_{O1-O2}$ | 2.65 |                          |
|                                  | $d_{O2-N1}$ | 3.27 |                          |
|                                  | $d_{N1-N2}$ | 1.10 |                          |
| <b><math>2O^*</math></b>         | $d_{M-O1}$  | 1.73 |                          |
|                                  | $d_{M-O2}$  | 1.73 |                          |
|                                  | $d_{O1-O2}$ | 2.64 |                          |
|                                  | $d_{M-O2}$  | 1.86 |                          |
|                                  | $d_{O1-O2}$ | 2.55 |                          |
|                                  | $d_{O1-C}$  | 2.65 |                          |
|                                  | $d_{C-H1}$  | 1.09 |                          |
|                                  | $d_{O2-H1}$ | 2.62 |                          |
| <b><math>CH_3O^*+OH^*</math></b> | $d_{M-O1}$  | 1.90 |                          |
|                                  | $d_{M-O2}$  | 1.90 |                          |
|                                  | $d_{O1-O2}$ | 2.67 |                          |
|                                  | $d_{O1-C}$  | 1.41 |                          |
|                                  | $d_{C-H2}$  | 1.10 |                          |
|                                  | $d_{O2-H1}$ | 2.53 |                          |
|                                  |             |      | Methanol-forming pathway |
| <b><math>O^sTS11</math></b>      | $d_{M-O1}$  | 1.81 |                          |
|                                  | $d_{M-O2}$  | 2.09 |                          |
|                                  | $d_{O1-O2}$ | 2.24 |                          |
|                                  | $d_{O1-C}$  | 1.42 |                          |
|                                  | $d_{O1-H1}$ | 2.09 |                          |
|                                  | $d_{O2-H1}$ | 3.47 |                          |
| <b><math>CH_3O^*+OH^*</math></b> | $d_{M-O1}$  | 1.73 |                          |
|                                  | $d_{M-O2}$  | 2.20 |                          |
|                                  | $d_{O1-O2}$ | 2.71 |                          |
|                                  | $d_{O1-C}$  | 3.05 |                          |
|                                  | $d_{O1-H1}$ | 2.57 |                          |
|                                  | $d_{O2-H1}$ | 2.04 |                          |
|                                  |             |      | Water-forming pathway    |
| <b><math>O^sTS12</math></b>      | $d_{M-O1}$  | 1.91 |                          |
|                                  | $d_{M-O2}$  | 2.05 |                          |
|                                  | $d_{O1-O2}$ | 2.48 |                          |
|                                  | $d_{O1-C}$  | 1.33 |                          |

|                                                            |             |      |
|------------------------------------------------------------|-------------|------|
|                                                            | $d_{C-H2}$  | 1.10 |
|                                                            | $d_{O2-H1}$ | 1.23 |
|                                                            | $d_{O2-H2}$ | 2.91 |
| $CH_2O^*+H_2O^*$                                           | $d_{M-O1}$  | 2.04 |
|                                                            | $d_{M-O2}$  | 2.20 |
|                                                            | $d_{O1-O2}$ | 3.20 |
|                                                            | $d_{O1-C}$  | 1.24 |
|                                                            | $d_{O2-H1}$ | 0.98 |
|                                                            | $d_{O2-H2}$ | 0.98 |
| N <sub>2</sub> O dissociation over 2O@Os <sub>1</sub> /PTA |             |      |
| <b>Os<sup>s</sup>TS13</b>                                  | $d_{M-O1}$  | 1.72 |
|                                                            | $d_{M-O2}$  | 1.79 |
|                                                            | $d_{O1-O2}$ | 2.65 |
|                                                            | $d_{O2-O3}$ | 1.70 |
|                                                            | $d_{O3-N3}$ | 1.67 |
| $O_2^*+N_2^*+O^*$                                          | $d_{M-O1}$  | 1.69 |
|                                                            | $d_{M-O2}$  | 2.25 |
|                                                            | $d_{O2-O3}$ | 1.24 |
|                                                            | $d_{O3-N3}$ | 2.87 |
|                                                            | $d_{N3-N4}$ | 1.10 |

**Table S6.** The relative energies (kcal/mol) and key geometry parameters of each state.

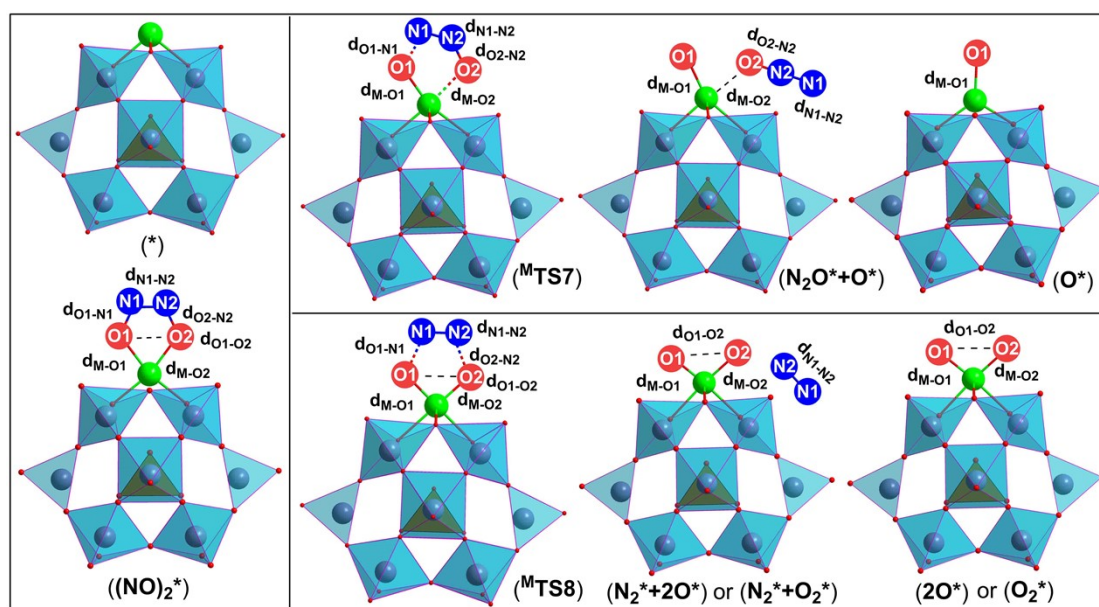

|   | Rh                | Os   |
|---|-------------------|------|
|   | Relative energies |      |
| * | 0.00              | 0.00 |

|                                              |                    |        |         |
|----------------------------------------------|--------------------|--------|---------|
| $(\text{NO})_2^*$                            |                    | -13.17 | -68.85  |
| Relative energies (single ROS pathway)       |                    |        |         |
| $^{\text{M}}\text{TS7}$                      |                    | 1.74   | -62.82  |
| $\text{N}_2\text{O}^*+\text{O}^*$            |                    | -20.56 | -87.63  |
| $\text{O}^*$                                 |                    | -40.63 | -85.11  |
| Relative energies (double ROS pathway)       |                    |        |         |
| $^{\text{M}}\text{TS8}$                      |                    | 16.21  | -51.64  |
| $\text{N}_2^*+2\text{O}^*$                   |                    |        | -114.56 |
| or                                           |                    | -41.33 |         |
| $(\text{N}_2^*+\text{O}_2^*)$                |                    |        |         |
| $(2\text{O}^*)$                              |                    |        | -113.18 |
| $\text{O}_2^*$                               |                    | -42.04 | -76.12  |
|                                              |                    | Rh     | Os      |
| Key geometry parameters                      |                    |        |         |
| $(\text{NO})_2^*$                            | $d_{\text{M-O1}}$  | 2.02   | 1.93    |
|                                              | $d_{\text{M-O2}}$  | 2.02   | 1.93    |
|                                              | $d_{\text{O1-O2}}$ | 2.42   | 2.36    |
|                                              | $d_{\text{O1-N1}}$ | 1.29   | 1.36    |
|                                              | $d_{\text{O2-N2}}$ | 1.29   | 1.36    |
|                                              | $d_{\text{N1-N2}}$ | 1.29   | 1.25    |
| Key geometry parameters (single ROS pathway) |                    |        |         |
| $^{\text{M}}\text{TS7}$                      | $d_{\text{M-O1}}$  | 1.86   | 1.81    |
|                                              | $d_{\text{M-O2}}$  | 2.14   | 1.20    |
|                                              | $d_{\text{O1-N1}}$ | 1.71   | 1.71    |
|                                              | $d_{\text{O2-N2}}$ | 1.26   | 1.33    |
|                                              | $d_{\text{N1-N2}}$ | 1.19   | 1.20    |
| $\text{N}_2\text{O}^*+\text{O}^*$            | $d_{\text{M-O1}}$  | 1.78   | 1.72    |
|                                              | $d_{\text{M-O2}}$  | 2.34   | 2.46    |
|                                              | $d_{\text{O2-N2}}$ | 1.21   | 1.20    |
|                                              | $d_{\text{N1-N2}}$ | 1.13   | 1.13    |
| $\text{O}^*$                                 | $d_{\text{M-O1}}$  | 1.78   | 1.68    |
| Key geometry parameters (double ROS pathway) |                    |        |         |
| $^{\text{M}}\text{TS8}$                      | $d_{\text{M-O1}}$  | 1.81   | 1.73    |
|                                              | $d_{\text{M-O2}}$  | 1.81   | 1.96    |
|                                              | $d_{\text{O1-O2}}$ | 2.65   | 2.59    |
|                                              | $d_{\text{O1-N1}}$ | 1.90   | 2.37    |
|                                              | $d_{\text{O2-N2}}$ | 1.90   | 1.47    |
|                                              | $d_{\text{N1-N2}}$ | 1.14   | 1.15    |
| $\text{N}_2^*+2\text{O}^*$                   | $d_{\text{M-O1}}$  |        | 1.73    |
|                                              | $d_{\text{M-O2}}$  |        | 1.73    |
|                                              | $d_{\text{O1-O2}}$ |        | 2.65    |
|                                              | $d_{\text{N1-N2}}$ |        | 1.11    |
| or                                           | $d_{\text{M-O1}}$  | 2.10   |         |
| $(\text{N}_2^*+\text{O}_2^*)$                |                    |        |         |



|                       |             |      |      |
|-----------------------|-------------|------|------|
|                       | $d_{M-O2}$  | 2.12 |      |
|                       | $d_{O1-O2}$ | 2.18 |      |
|                       | $d_{N1-N2}$ | 2.11 |      |
| <b>(20*)</b>          | $d_{M-O1}$  |      | 1.73 |
|                       | $d_{M-O2}$  |      | 1.73 |
|                       | $d_{O1-O2}$ |      | 2.64 |
| <b>O<sub>2</sub>*</b> | $d_{M-O1}$  | 2.10 | 1.96 |
|                       | $d_{M-O2}$  | 2.10 | 1.97 |
|                       | $d_{O1-O2}$ | 1.28 | 1.40 |

---
